# Supplementary material
Source: Springer Nature journal article supplement (https://www.springermedizin.de/resource/supplementary/13045_2010_140_MOESM6_ESM.pdf/9660844)
Supplement: MOESM6 [file 9660844]

JURL-MK2  
(sensitive)

SUP-B15  
(resistant)

control

0.2  $\mu$ M imatinib

1.0  $\mu$ M imatinib

0.02  $\mu$ M nilotinib

0.1  $\mu$ M Nilotinib

control

0.2  $\mu$ M imatinib

1.0  $\mu$ M imatinib

0.02  $\mu$ M nilotinib

0.1  $\mu$ M nilotinib

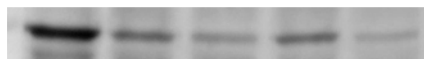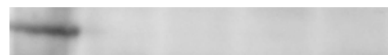

pSTAT5

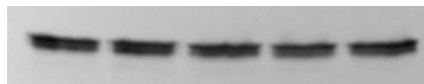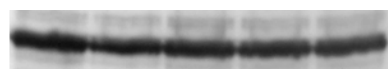

STAT5

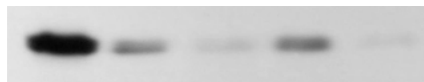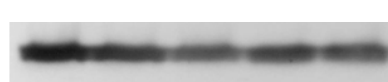

pRPS6

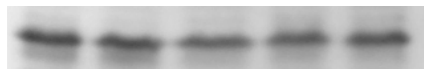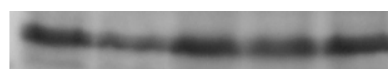

RPS6

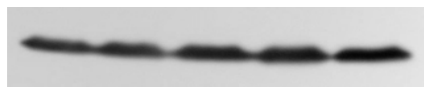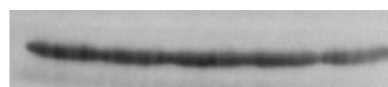

GAPDH
